# Supplementary material for: Linking iron(iii) carboxylates into high-nuclearity complexes by using Bis-tris
Source: Royal Society of Chemistry journal article supplement (doi:10.1039/b715932c), 2007-11-16
Supplement: b715932c.pdf [file b715932c.pdf]

## Linking iron(III) carboxylates into high-nuclearity complexes by using Bis-tris

Alan Ferguson, Julie McGregor, Andrew Parkin and Mark Murrie

*Supporting information*

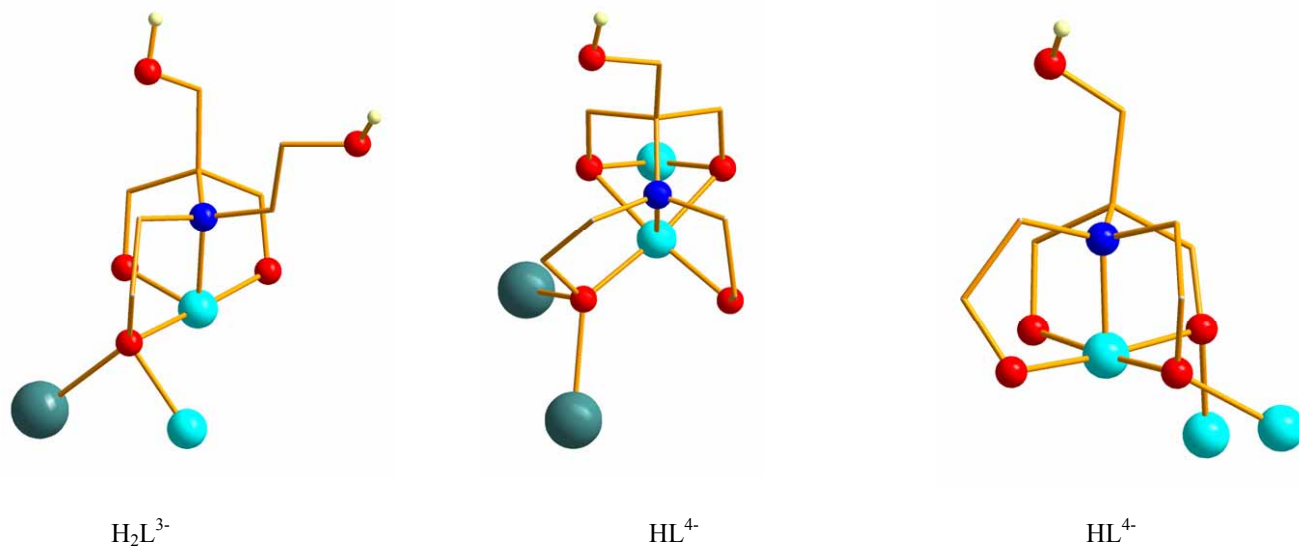

Fig. S1 Previously reported binding modes of deprotonated Bis-tris (Co, cyan; Na, blue-green; O, red; N, blue; C, rods). For further details, see A. Ferguson, A. Parkin and M. Murrie, *Dalton Trans.*, 2006, 3627.
